# Supplementary material
Source: PubMed Central journal article supplement (PMC7966602)
Supplement: 3886_tables.pdf [file 3886_tables.pdf]

**On-line Table 1: Angioarchitecture (all ages)<sup>a</sup>**

| Characteristic                     | No. (%)    | Median Dx Age (yr) | 95% CI     | P Value <sup>b</sup> |
|------------------------------------|------------|--------------------|------------|----------------------|
| AVM nidus size                     |            |                    |            | .009                 |
| <3 cm                              | 417 (55%)  | 37.1               | 34.1–40.2  |                      |
| 3–6 cm                             | 305 (40%)  | 30.7               | 27.9–34.5  |                      |
| >6 cm                              | 38 (5%)    | 26.8               | 16.9–33.9  |                      |
| AVM side                           |            |                    |            | .087                 |
| Right                              | 321 (44%)  | 32.8               | 29.8–35.9  |                      |
| Left                               | 363 (50%)  | 34.1               | 32.1–37.1  |                      |
| Middle                             | 39 (5%)    | 37.2               | 27.6–53.8  |                      |
| Central location                   |            |                    |            | .617                 |
| Yes                                | 282 (38%)  | 29.5               | 27.4–33.6  |                      |
| No                                 | 453 (62%)  | 36.6               | 33.8–38.4  |                      |
| Dural location                     |            |                    |            | .518                 |
| Yes                                | 3 (<1%)    | 25.9               | NA         |                      |
| No                                 | 723 (>99%) | 34.1               | 32.2–36.6  |                      |
| Lobar location                     |            |                    |            | .050                 |
| Yes                                | 555 (76%)  | 34.5               | 32.7–37.0  |                      |
| No                                 | 180 (24%)  | 30.1               | 26.8–39.8  |                      |
| Posterior fossa location           |            |                    |            | <.001                |
| Yes                                | 110 (15%)  | 40.9               | 28.6–47.8  |                      |
| No                                 | 616 (85%)  | 33.6               | 31.4–35.7  |                      |
| Eloquence                          |            |                    |            | <.001                |
| Yes                                | 452 (61%)  | 31.5               | 9.0–34.1   |                      |
| No                                 | 292 (39%)  | 37.4               | 34.3–42.3  |                      |
| AVM border                         |            |                    |            | .707                 |
| Compact                            | 573 (80%)  | 35.1               | 33.2–37.7  |                      |
| Diffuse                            | 140 (20%)  | 31.2               | 27.4–37.2  |                      |
| Venous drainage                    |            |                    |            | .040                 |
| Superficial                        | 389 (51%)  | 37.8               | 34.9–40.6  |                      |
| Superficial and deep               | 238 (31%)  | 31.5               | 28.1–35.1  |                      |
| Exclusively deep                   | 134 (18%)  | 26.2               | 21.9–32.2  |                      |
| No. of draining veins              |            |                    |            | .572                 |
| 1 vein                             | 208 (39%)  | 33.2               | 28.4–36.9  |                      |
| 2+ veins                           | 329 (61%)  | 34.9               | 32.2–37.5  |                      |
| No. of veins reaching sinus        |            |                    |            | .678                 |
| 0–1 veins                          | 171 (34%)  | 32.3               | 28.3–37.0  |                      |
| 2+ veins                           | 330 (66%)  | 34.1               | 31.4–37.0  |                      |
| Venous stenosis (%)                |            |                    |            | .761                 |
| 0–24                               | 266 (47%)  | 32.2               | 28.3–36.1  |                      |
| 25–49                              | 93 (16%)   | 38.1               | 32.2–42.4  |                      |
| 50–74                              | 126 (22%)  | 34.4               | 31.1–40.0  |                      |
| 75–99                              | 71 (12%)   | 33.2               | 28.4–39.0  |                      |
| 100                                | 15 (3%)    | 41.6               | 27.4–50.3  |                      |
| Venous thrombosis (%)              |            |                    |            | .551                 |
| 0–24                               | 504 (96%)  | 34.0               | 32.1–36.6  |                      |
| 25–49                              | 4 (1%)     | 21.1               | NA         |                      |
| 50–74                              | 4 (1%)     | 18.0               | NA         |                      |
| 75–99                              | 1 (<1%)    | NA                 | NA         |                      |
| 100                                | 14 (3%)    | 34.1               | 2.2–50.3   |                      |
| Venous ectasia                     |            |                    |            | .040                 |
| Yes                                | 273 (48%)  | 39.4               | 35.3–42.8  |                      |
| No                                 | 292 (52%)  | 31.1               | 28.1–33.9  |                      |
| Venous reflux                      |            |                    |            | .159                 |
| Yes                                | 161 (29%)  | 38.1               | 32.9–43.4  |                      |
| No                                 | 387 (71%)  | 33.4               | 30.0–35.8  |                      |
| Moyamoya type changes              |            |                    |            | .659                 |
| Yes                                | 8 (1%)     | 27.4               | 21.4–49.3  |                      |
| No                                 | 563 (99%)  | 33.9               | 31.5–36.5  |                      |
| Pial-to-pial collateralization     |            |                    |            | .425                 |
| Yes                                | 120 (21%)  | 36.1               | 29.5–39.8  |                      |
| No                                 | 448 (79%)  | 33.8               | 31.3–36.6  |                      |
| Aneurysm related to shunt flow     |            |                    |            | <.001                |
| Yes                                | 172 (25%)  | 44.1               | 28.9–33.9  |                      |
| No                                 | 515 (75%)  | 31.6               | 40.0–47.8  |                      |
| Aneurysm not related to shunt flow |            |                    |            | .069                 |
| Yes                                | 16 (2%)    | 47.1               | 2.1–36.5   |                      |
| No                                 | 670 (98%)  | 33.9               | 34.5–53.8  |                      |
| Intranidal aneurysm                |            |                    |            | 0.143                |
| Yes                                | 107 (16%)  | 31.9               | 26.6–39.4  |                      |
| No                                 | 575 (84%)  | 34.6               | 32.8, 37.0 |                      |

**Note:**—Dx indicates diagnosis; NA, not applicable.

<sup>a</sup> All variables are missing varying amounts of data.

<sup>b</sup> P values are from log-rank tests of survivor functions.

**On-line Table 2: Angioarchitecture (children vs adults)<sup>a</sup>**

| Characteristic                     | All (N = 833) | Child (0–18 yr)<br>(n = 203) | Adult (≥19 yr)<br>(n = 630) | P Value <sup>b</sup> |
|------------------------------------|---------------|------------------------------|-----------------------------|----------------------|
| AVM nidus size                     |               |                              |                             | .069                 |
| <3 cm                              | 417 (55%)     | 95 (53%)                     | 322 (55%)                   |                      |
| 3–6 cm                             | 305 (40%)     | 68 (38%)                     | 237 (41%)                   |                      |
| >6 cm                              | 38 (5%)       | 15 (8%)                      | 23 (4%)                     |                      |
| AVM side                           |               |                              |                             | .839                 |
| Right                              | 321 (44%)     | 79 (46%)                     | 242 (44%)                   |                      |
| Left                               | 363 (50%)     | 84 (49%)                     | 279 (51%)                   |                      |
| Middle                             | 39 (5%)       | 10 (6%)                      | 29 (5%)                     |                      |
| Central location                   |               |                              |                             | .075                 |
| Yes                                | 282 (38%)     | 78 (44%)                     | 201 (36%)                   |                      |
| No                                 | 453 (62%)     | 98 (56%)                     | 355 (64%)                   |                      |
| Dural location                     |               |                              |                             | 1.000                |
| Yes                                | 3 (<1%)       | 0 (0%)                       | 3 (1%)                      |                      |
| No                                 | 723 (>99%)    | 174 (100%)                   | 549 (99%)                   |                      |
| Lobar location                     |               |                              |                             | .131                 |
| Yes                                | 555 (76%)     | 125 (71%)                    | 430 (77%)                   |                      |
| No                                 | 180 (24%)     | 51 (29%)                     | 129 (23%)                   |                      |
| Posterior fossa location           |               |                              |                             | .809                 |
| Yes                                | 110 (15%)     | 25 (14%)                     | 85 (15%)                    |                      |
| No                                 | 616 (85%)     | 151 (86%)                    | 465 (85%)                   |                      |
| Eloquence                          |               |                              |                             | .212                 |
| Yes                                | 452 (61%)     | 112 (65%)                    | 340 (59%)                   |                      |
| No                                 | 292 (39%)     | 60 (35%)                     | 232 (41%)                   |                      |
| AVM border                         |               |                              |                             | .218                 |
| Compact                            | 573 (80%)     | 126 (77%)                    | 447 (81%)                   |                      |
| Diffuse                            | 140 (20%)     | 38 (23%)                     | 102 (19%)                   |                      |
| Venous drainage                    |               |                              |                             | <.001                |
| Superficial                        | 389 (51%)     | 67 (37%)                     | 322 (55%)                   |                      |
| Superficial and deep               | 238 (31%)     | 61 (34%)                     | 177 (30%)                   |                      |
| Exclusively deep                   | 134 (18%)     | 51 (28%)                     | 83 (14%)                    |                      |
| Number of draining veins           |               |                              |                             | .046                 |
| 1 vein                             | 208 (39%)     | 58 (47%)                     | 150 (36%)                   |                      |
| 2+ veins                           | 329 (61%)     | 66 (53%)                     | 263 (64%)                   |                      |
| No. of veins reaching sinus        |               |                              |                             | .117                 |
| 0–1 veins                          | 171 (34%)     | 46 (40%)                     | 125 (32%)                   |                      |
| 2+ veins                           | 330 (66%)     | 68 (60%)                     | 262 (68%)                   |                      |
| Venous stenosis (%)                |               |                              |                             | .144                 |
| 0–24                               | 266 (47%)     | 75 (56%)                     | 191 (44%)                   |                      |
| 25–49                              | 93 (16%)      | 22 (16%)                     | 71 (16%)                    |                      |
| 50–74                              | 126 (22%)     | 24 (18%)                     | 102 (23%)                   |                      |
| 75–99                              | 71 (12%)      | 12 (9%)                      | 59 (14%)                    |                      |
| 100                                | 15 (3%)       | 2 (1%)                       | 13 (3%)                     |                      |
| Venous thrombosis (%)              |               |                              |                             | .607                 |
| 0–24                               | 504 (96%)     | 121 (96%)                    | 383 (96%)                   |                      |
| 25–49                              | 4 (1%)        | 0 (0%)                       | 4 (1%)                      |                      |
| 50–74                              | 4 (1%)        | 2 (2%)                       | 2 (1%)                      |                      |
| 75–99                              | 1 (<1%)       | 0 (0%)                       | 1 (<1%)                     |                      |
| 100                                | 14 (3%)       | 3 (2%)                       | 11 (3%)                     |                      |
| Venous ectasia                     |               |                              |                             | <.001                |
| Yes                                | 273 (48%)     | 45 (35%)                     | 228 (52%)                   |                      |
| No                                 | 292 (52%)     | 85 (65%)                     | 208 (48%)                   |                      |
| Venous reflux                      |               |                              |                             | .075                 |
| Yes                                | 161 (29%)     | 29 (23%)                     | 132 (31%)                   |                      |
| No                                 | 387 (71%)     | 98 (77%)                     | 289 (69%)                   |                      |
| Moyamoya type changes              |               |                              |                             | .208                 |
| Yes                                | 8 (1%)        | 0 (0%)                       | 8 (2%)                      |                      |
| No                                 | 563 (99%)     | 135 (100%)                   | 428 (98%)                   |                      |
| Pial-to-pial collateralization     |               |                              |                             | .090                 |
| Yes                                | 120 (21%)     | 21 (16%)                     | 99 (23%)                    |                      |
| No                                 | 448 (79%)     | 112 (84%)                    | 336 (77%)                   |                      |
| Aneurysm related to shunt flow     |               |                              |                             | <.001                |
| Yes                                | 172 (25%)     | 21 (13%)                     | 151 (29%)                   |                      |
| No                                 | 515 (75%)     | 139 (87%)                    | 376 (71%)                   |                      |
| Aneurysm not related to shunt flow |               |                              |                             | .384                 |
| Yes                                | 16 (2%)       | 2 (1%)                       | 14 (3%)                     |                      |
| No                                 | 670 (98%)     | 158 (99%)                    | 512 (97%)                   |                      |
| Intranidal aneurysm                |               |                              |                             | .537                 |
| Yes                                | 107 (16%)     | 28 (17%)                     | 79 (15%)                    |                      |
| No                                 | 575 (84%)     | 134 (83%)                    | 441 (85%)                   |                      |

<sup>a</sup> Table entries are No. (%) or mean ± SD. Note that all variables are missing varying amounts of data.

<sup>b</sup> P values are from the Fisher exact test.
